# Supplementary material
Source: publisher figshare collection journal article supplement (https://sage.figshare.com/ndownloader/files/18531191)
Supplement: Supplementary file 1 [file 18531191]

## FBR Research Questions

1. How can we explain that family firms are engaging in the market for corporate control despite their well-documented loss aversion?
2. Could it be that family firms with their longer time orientation neglect the option of firm acquisitions and therewith forgo an important strategic means that promises longer-term advantages?
3. How can we explain that the post-acquisition performance of family firms has been shown to be not worse than that of non-family firms?
